# Supplementary material for: A Comparative Analysis of the Nutritional Quality of Salmon Species in Canada among Different Production Methods and Regions
Source: Hindawi journal article supplement (doi:10.1155/2023/5542117), 2023-12-15
Supplement: f1 [file 5542117.f1.docx]

Supplementary Table S1.

| **Species** | **Wild or Farmed** | **18:2n-6** | **18:3n-3** | **20:5n-3** | **22:5n-3** | **22:6n-3** | **SFA** | **MUFA** | **PUFA** | **Ref number** |
| --- | --- | --- | --- | --- | --- | --- | --- | --- | --- | --- |
| Sockeye | Wild | 1.53 | 1.13 | 6.11 | 1.42 | 13.4 | 22.9 | 46.4 | 30.02 | 1 |
| Sockeye | Wild | 1.8 | 1.19 | 7.65 | 2.09 | 13.4 | 1.32 | 2.63 | 1.62 | 2 |
| Sockeye | Wild | 1.6 | 0.8 | 8.7 | 2.4 | 22.9 | 23.2 | 31.4 | 45.4 | 3 |
| Sockeye | Wild | 2.1 | 1 | 8.2 | 2.3 | 16 | 22.6 | 46.8 | 30.7 | 3 |
| Sockeye | Wild | 2.2 | 1 | 7.2 | 2.3 | 13.6 | 20.8 | 48.8 |  | 4 |
| Sockeye | Wild | 1.8 | 3.4 | 7.6 | 2.5 | 15.9 | 24 | 40.9 |  | 4 |
| Sockeye | Wild | 1.27 | 0.66 | 6.65 | 1.83 | 7.8 | 22.71 | 51.41 | 22.27 | 5 |
| Sockeye | Wild | 0.92 | 0.46 | 8.76 | 2.16 | 21.78 |  |  |  | 6 |
| Sockeye | Wild | 1.86 | 1.4 | 1.92 | 2.76 | 37.47 |  |  |  | 6 |
| Sockeye | Farmed | 3.9 | 0.5 | 4 | 0.9 | 8.1 | 31.8 |  |  | 7 |
| Sockeye | Wild | 3.8 | 0.5 | 3.8 | 0.8 | 6.6 | 36.5 |  |  | 7 |
| Sockeye | Wild | 6.9 | 3 | 5.2 | 1.2 | 3.8 | 36.9 |  |  | 7 |
| Sockeye | Wild | 0.5 |  | 6.7 | 1.8 | 43.2 | 32.9 | 10.4 | 55.2 | 8 |
| Pink | Wild | 1.05 | 0.67 | 8.28 | 2.53 | 20.5 | 28.8 | 31.2 | 39.48 | 1 |
| Pink | Wild | 1.91 | 1.98 | 9.94 | 3.25 | 17.5 | 0.92 | 1.24 | 1.36 | 2 |
| Pink | Wild | 3.4 | 2 | 7.8 | 2.3 | 20.5 | 23.9 | 34.3 |  | 4 |
| Pink | Wild | 1.9 | 1.5 | 8.1 | 2.6 | 27.6 | 24.8 | 28.1 |  | 4 |
| Pink | Wild | 3.1 | 1.7 | 8.1 | 2.5 | 24.4 | 21.7 | 33.7 |  | 4 |
| Pink | Wild | 1.27 | 0.82 | 8.19 | 1.17 | 4.88 | 36.86 | 42.88 | 19.42 | 9 |
| Pink | Wild | 1.38 | 0.83 | 9.12 | 1.36 | 4.76 | 34.22 | 44.5 | 20.56 | 9 |
| Pink | Wild | 0.69 | 0.43 | 14.91 | 2.65 | 28.87 | 29.05 | 19.39 | 50.1 | 9 |
| Pink | Wild | 1.73 | 1.11 | 7.7 | 2.75 | 15.78 | 16.51 | 40.05 | 38.5 | 10 |
| Pink | Wild | 1.26 | 1.46 | 10.8 | 3.51 | 15.9 | 23.2 | 31.9 |  | 11 |
| Pink | Wild | 0.5 |  | 6.5 | 1.5 | 51.1 | 25.2 | 9.8 | 63 | 8 |
| Pink | Farmed | 5 | 0.8 | 5.4 | 2.7 | 21.8 |  |  |  | 12 |
| Pink | Farmed | 4.9 | 0.7 | 6.3 | 2.9 | 26.9 |  |  |  | 12 |
| Pink | Farmed | 3.1 | 0.7 | 8.6 | 4 | 38.8 |  |  |  | 12 |
| Pink | Farmed | 5 | 1.1 | 8.1 | 4.6 | 33.1 |  |  |  | 12 |
| Masu | Wild | 1.08 | 0.75 | 6.34 | 2.17 | 9.98 | 26.94 | 47.96 | 24.44 | 9 |
| Masu | Wild | 1.37 | 0.76 | 5.84 | 1.87 | 6.49 | 26.64 | 47.83 | 24.69 | 9 |
| Masu | Wild | 0.35 | 0.4 | 4.96 | 2.09 | 26.91 | 42.51 | 20.59 | 36.65 | 9 |
| Masu | Wild | 11.3 | 1 | 2.9 | <0.1 | 8.1 | 28.1 | 46.8 | 25.1 | 13 |
| Masu | Wild | 10.5 | 1 | 2.6 | <0.1 | 7.8 | 27.7 | 48.9 | 23.4 | 13 |
| Masu | Wild | 7.8 | 1 | 5.2 | 0.4 | 10.5 | 29.5 | 43.1 | 27.4 | 13 |
| Masu | Wild | 8 | 0.6 | 3.1 | <0.1 | 3.8 | 34.5 | 47.9 | 17.6 | 13 |
| Masu | Wild | 4.5 | 0.2 | 6.9 | 0.6 | 8.4 | 38.4 | 39 | 22.6 | 13 |
| Masu | Wild | 4.2 | 0.7 | 7.4 | 2.3 | 18.4 | 28 | 34.5 | 37.5 | 13 |
| Masu | Wild | 5.5 | 0.4 | 6.4 | 1.7 | 12.3 | 31.3 | 39.5 | 29.2 | 13 |
| Masu | Wild | 10 | 0.3 | 2.7 | <0.1 | 15.8 | 28.1 | 41.6 | 30.3 | 13 |
| Masu | Wild | 7 | 0.5 | 6.1 | <0.1 | 20.4 | 36.2 | 28.7 | 35.1 | 13 |
| Masu | Wild | 5 | 0.6 | 5.3 | 0.5 | 8.7 | 41.2 | 36.4 | 22.4 | 13 |
| Masu | Wild | 1.6 | 0.5 | 7 | 1.7 | 7.3 | 39.8 | 40.2 | 20 | 13 |
| Masu | Wild | 1.6 | 0.2 | 9.9 | 1.6 | 11 | 34.7 | 36.2 | 29.1 | 13 |
| Masu | Wild | 1.1 | 0.5 | 8.4 | 3 | 12.1 | 33.4 | 38.2 | 28.4 | 13 |
| Masu | Wild | 6 | 0.4 | 2.1 | <0.1 | 23.6 | 40.4 | 26.6 | 32.9 | 13 |
| Masu | Wild | 6 | 0.6 | 4.2 | <0.1 | 16.1 | 42.8 | 28.2 | 29 | 13 |
| Masu | Wild | 3.9 | 0.4 | 6.1 | <0.1 | 24.2 | 40.1 | 23 | 36.9 | 13 |
| Masu | Wild | 3.1 | <0.1 | 2.1 | <0.1 | 9.8 | 58.6 | 25.4 | 16 | 13 |
| Masu | Wild | 2 | 0.4 | 7.6 | 0.8 | 20.4 | 42.2 | 23.9 | 33.8 | 13 |
| Masu | Wild | 2.3 | <0.1 | 6.5 | 1 | 18.9 | 43.3 | 24.8 | 31.9 | 13 |
| Masu | Wild | 1.6 | <0.1 | 6 | 0.8 | 15.5 | 49 | 25.5 | 25.6 | 13 |
| Masu | Wild | 3.6 | <0.1 | 1.3 | <0.1 | 35.4 | 39.9 | 19.4 | 40.7 | 13 |
| Masu | Wild | 4.3 | 0.1 | 6.2 | <0.1 | 27.6 | 42.1 | 17.7 | 40.3 | 13 |
| Masu | Wild | 2.3 | <0.1 | 4 | <0.1 | 11.5 | 56.7 | 24.4 | 18.9 | 13 |
| Masu | Wild | 0.6 | 0.3 | 7.1 | <0.1 | 18.2 | 48.3 | 23.1 | 28.5 | 13 |
| Masu | Wild | 1.3 | <0.1 | 5.3 | <0.1 | 15.5 | 57.8 | 18.8 | 23.3 | 13 |
| Masu | Wild | 0.8 | 0.5 | 10.6 | 2 | 16.8 | 44.4 | 22.4 | 33.2 | 13 |
| Coho | Wild | 2.05 | 1 | 12.6 | 4.78 | 15.1 | 1.32 | 1.96 | 2.11 | 2 |
| Coho | Wild | 1.01 | 0.77 | 9.27 | 2.54 | 27.2 | 0.58 | 0.68 | 0.93 | 2 |
| Coho | Farmed | 9.44 | 1.34 | 6.64 | 4.07 | 15.2 | 1.1 | 1.55 | 1.75 | 2 |
| Coho | Farmed | 10.19 | 1.58 | 6.5 | 3.67 | 9.7 | 1.97 | 3.09 | 2.8 | 2 |
| Coho | Wild | 2.2 | 1 | 7.2 | 2.3 | 13.6 | 20.8 | 48.8 |  | 4 |
| Coho | Farmed | 2.49 | 0.94 | 8.14 | 3.22 | 12.5 | 29.16 | 33.39 | 33.5 | 5 |
| Coho | Farmed | 2.65 | 0 | 12.73 | 4.19 | 31.15 | 27.92 | 14.92 |  | 14 |
| Coho | Farmed | 3.88 | 0.77 | 11.46 | 5.09 | 17.18 | 23.77 |  |  | 15 |
| Coho | Wild | 5.18 | 1.47 | 4.55 | 2 | 15.4 | 27.7 | 28 |  | 16 |
| Coho | Wild | 3.34 | 3.69 | 3.64 | 2.4 | 13.2 | 35.9 | 15.8 |  | 16 |
| Chum | Wild | 1.8 | 0.8 | 7.1 | 1.6 | 10.3 | 21.4 | 52.8 |  | 4 |
| Chum | Wild | 0.91 | 0.72 | 7.03 | 2.07 | 20.2 | 23.99 | 38.63 | 34.96 | 17 |
| Chum | Wild | 0.87 | 0.48 | 9.35 | 3 | 20.59 | 23.7 | 37 | 37.8 | 17 |
| Chum | Wild | 1.21 | 0.77 | 6.6 | 3.51 | 23.9 | 13.7 | 40.25 | 39.76 | 17 |
| Chum | Wild | 1.1 | 0.5 | 13.9 | 1.1 | 3.7 | 39.8 | 35 | 22 | 18 |
| Chum | Wild | 0.6 | 0.5 | 4 | 3.5 | 6.5 | 18.7 | 63.7 | 17.2 | 18 |
| Chum | Wild | 1.1 | 1 | 9.8 | 3.4 | 9.6 | 24.9 | 46.8 | 28.2 | 18 |
| Chum | Wild | 0.5 | 0.4 | 12.2 | 2.6 | 16.6 | 39.9 | 25.3 | 34.1 | 18 |
| Chum | Wild | 0.8 | 0.8 | 9.4 | 2 | 6.5 | 41.3 | 34 | 21.7 | 18 |
| Chum | Wild | 0.9 | 0.7 | 2.4 | 3.7 | 5 | 15.3 | 69.7 | 14.5 | 18 |
| Chum | Wild | 1.2 | 1.1 | 7.8 | 3.7 | 14.5 | 24.5 | 44.2 | 30.9 | 18 |
| Chum | Wild | 0.5 | 0.4 | 11.1 | 2.5 | 26.1 | 37.6 | 19.6 | 42.5 | 18 |
| Chum | Wild | 0.4 |  | 8.1 | 1.6 | 50.5 | 27 | 8.2 | 63.4 | 19 |
| Chum | Wild | 0.4 |  | 19.9 | 3.3 | 33.6 | 27.4 | 12.6 | 58.5 | 19 |
| Chum | Wild | 0.4 |  | 16.3 | 2.3 | 42.1 | 27 | 9.1 | 63.3 | 19 |
| Chum | Wild | 1.17 | 0.6 | 6.71 | 2.18 | 6.59 |  |  |  | 20 |
| Chum | Wild | 1.16 | 0.52 | 3.68 | 3.63 | 9.97 |  |  |  | 20 |
| Chinook | Farmed | 9.42 | 2.38 | 2.69 | 1.42 | 5.19 | 20.2 | 53.5 | 25.9 | 1 |
| Chinook | Wild | 1.28 | 1.15 | 7.36 | 1.41 | 9.9 | 26.7 | 42.8 | 29.89 | 1 |
| Chinook | Wild | 1.44 | 0.78 | 8.11 | 2.2 | 14.9 | 0.99 | 1.59 | 1.04 | 2 |
| Chinook | Farmed | 5.06 | 1.19 | 4.58 | 1.96 | 8.75 | 26.43 | 43.97 | 26.46 | 5 |
| Chinook | Farmed | 5 | 0.7 | 5 | 1.6 | 9.7 | 25.9 | 49.8 | 23.6 | 21 |
| Chinook | Wild | 1.6 | 1.3 | 11.4 | 3.9 | 24.4 | 34.8 | 14.5 | 50.6 | 22 |
| Chinook | Wild | 1.3 | 1 | 10.3 | 3 | 23.3 | 34.8 | 17.8 | 43.6 | 22 |
| Chinook | Wild | 0.6 | 0.6 | 11.7 | 3.1 | 31.1 | 34.8 | 13.2 | 51.1 | 22 |
| Chinook | Wild | 1.6 | 1.4 | 11.5 | 3.6 | 23.4 | 34.8 | 17.7 | 47.2 | 22 |
| Chinook | Wild | 1.1 | 1.2 | 11.7 | 4 | 32.7 | 34.8 | 14.1 | 50.6 | 22 |
| Chinook | Wild | 1.1 | 1 | 8.9 | 2.9 | 31.4 | 34.8 | 17.2 | 49.3 | 22 |
| Chinook | Wild | 2.05 | 1.53 | 9.86 | 3.78 | 37.2 | 24.3 | 13.6 |  | 16 |
| Chinook | Farmed | 6.14 | 1.29 | 7.9 | 2.42 | 16.59 | 28.26 | 28.9 |  | 23 |
| Chinook | Farmed | 8.1 | 1.28 | 7.22 | 2.22 | 17.2 | 25.73 | 30.4 |  | 23 |
| Atlantic | Farmed | 14.6 | 3 | 2.57 | 0.97 | 2.54 | 18.9 | 50.7 | 30.2 | 1 |
| Atlantic | Farmed | 13.3 | 7.13 | 3.01 | 1.17 | 3.5 | 16.6 | 48.8 | 34.4 | 1 |
| Atlantic | Farmed | 5.6 | 0.9 | 9 | 3.8 | 13.3 | 25.2 | 32.8 | 41.2 | 24 |
| Atlantic | Farmed | 6 | 1.1 | 8.3 | 3.6 | 11.7 | 23.6 | 32.2 | 40.4 | 24 |
| Atlantic | Farmed | 5.6 | 0.9 | 9.8 | 3.8 | 12.4 | 25.2 | 33.6 | 40.5 | 24 |
| Atlantic | Farmed | 7.7 | 0.9 | 3.2 | 1.1 | 7.7 | 18.5 | 55 | 25.9 | 24 |
| Atlantic | Farmed | 8.72 | 0.23 | 4.76 | 2.05 | 11.6 | 23.2 | 39.5 | 37 | 25 |
| Atlantic | Farmed | 3.2 | 1 | 3.4 | 1.4 | 10.2 | 23.8 | 35.4 |  | 26 |
| Atlantic | Farmed | 5.4 | 0.9 | 13.8 | 4.9 | 11.3 | 29.1 | 30 | 40.9 | 2 |
| Atlantic | Farmed | 8.2 | 1.2 | 9.9 | 3.9 | 9.2 | 26.8 | 36.8 | 36.4 | 2 |
| Atlantic | Farmed | 4.97 | 0.88 | 4.82 | 1.64 | 13.68 |  |  |  | 27 |
| Atlantic | Wild | 1.35 | 1 | 6.58 | 3 | 14.56 | 20.84 | 46.56 | 30.95 | 28 |
| Atlantic | Farmed | 14.38 | 10.34 | 2.64 | 1.37 | 4.94 | 15.05 | 40.84 | 41.93 | 28 |
| Atlantic | Farmed | 12.8 | 5.1 | 2.6 | 1.4 | 5.6 | 14.2 | 50.6 | 32.8 | 28 |
| Atlantic | Farmed | 13.2 | 4.6 | 2.4 | 1.4 | 3.7 | 15.4 | 55 | 29.6 | 29 |
| Atlantic | Farmed | 13.6 | 5.1 | 3.3 | 1.8 | 5.3 | 17.6 | 48.4 | 33.9 | 29 |
| Atlantic | Wild | 1.7 | 0.8 | 2.8 | 2.6 | 6.4 | 15.6 | 65.3 | 18.9 | 29 |
| Atlantic | Wild | 1.5 | 0.9 | 5 | 3.2 | 12.4 | 20.9 | 50.3 | 26.7 | 29 |
| Atlantic | Farmed | 13.2 | 3.56 | 4.11 | 1.93 | 4.3 | 2.63 | 6.1 | 3.77 | 2 |
| Atlantic | Farmed | 10.6 | 3.6 | 6 | 2.5 | 7.5 | 20.4 | 44.1 |  | 4 |
| Atlantic | Farmed | 9.1 | 3.2 | 4.2 | 1.7 | 7.3 | 18.9 | 51.1 |  | 4 |
| Atlantic | Farmed | 3 | 1.1 | 8.2 | 3.9 | 12 | 24.5 | 40.4 |  | 4 |
| Atlantic | Farmed | 1.11 | 0.28 | 0.65 | 0.3 | 0.88 | 2.54 | 4.96 | 3.92 | 30 |
| Atlantic | Wild | 0.02 | 0.01 | 0.14 | 0.04 | 0.31 | 0.47 | 0.83 | 0.59 | 30 |
| Atlantic | Farmed | 7.4 | 1.6 | 7.9 |  | 15.2 | 25.6 | 33.4 | 41 | 31 |
| Atlantic | Wild | 1.2 | 0.5 | 6.6 |  | 13.1 | 19 | 53.7 | 27.3 | 31 |
| Atlantic | Farmed | 6.71 | 1.33 | 7.56 | 2.95 | 11.87 |  |  |  | 32 |
| Atlantic | Farmed | 10.03 | 2.61 | 2.44 | 1.01 | 10.16 |  | 46.89 | 31.55 | 33 |
| Atlantic | Wild | 5.12 | 8.52 | 6.17 | 2.52 | 8.6 |  | 30.4 | 40.28 | 33 |
| Atlantic | Farmed | 8.1 | 0.7 | 2.5 | 1 | 9.7 | 20.7 | 50.7 |  | 34 |
| Atlantic | Farmed | 3.7 | 0.3 | 7.7 | 1.9 | 35.1 | 23.6 | 19.6 |  | 34 |
| Atlantic | Farmed | 8.8 | 0.8 | 1.7 | 0.9 | 6.2 | 20.3 | 55.1 |  | 34 |
| Atlantic | Farmed | 9.6 | 0.8 | 2.1 | 1.1 | 9.6 | 21.1 | 49.6 |  | 34 |
| Atlantic | Farmed | 4 | 0.3 | 6.6 | 1.6 | 36.2 | 25.6 | 17.8 |  | 34 |
| Atlantic | Farmed | 10.3 | 0.8 | 1.4 | 1 | 5.7 | 20 | 54.6 |  | 34 |
| Atlantic | Wild | 3.1 | 2.2 | 4.6 | 3.3 | 15.4 | 24.4 | 26.5 |  | 34 |
| Atlantic | Wild | 1.7 | 1.5 | 5.5 | 3.4 | 21.8 | 27.9 | 18 |  | 34 |
| Atlantic | Wild | 5.2 | 3 | 2.1 | 2.4 | 4.1 | 25.3 | 40.8 |  | 34 |
| Atlantic | Wild | 5.1 | 8.5 | 6.2 |  | 8.6 | 28.9 | 30.4 | 40.3 | 35 |
| Atlantic | Wild | 5.1 | 7.6 | 6.2 |  | 7.9 | 29.4 | 32.1 | 38 | 35 |
| Atlantic | Farmed | 9.67 | 1.09 | 2.52 | 0.89 | 5.43 | 26.67 | 49.9 | 23.43 | 36 |
| Atlantic | Farmed | 9.71 | 0.3 | 2.6 | 0.85 | 6.82 | 28.31 | 46.54 | 25.15 | 36 |
| Atlantic | Farmed | 7.5 | 2.2 | 3.2 | 1.4 | 11.7 | 22.6 | 44.6 | 31.6 | 37 |
| Atlantic | Farmed | 7.2 | 2.2 | 3.2 | 1.4 | 11 | 22.6 | 45.7 | 30.5 | 37 |
| Atlantic | Farmed | 16.3 | 2.9 | 2.2 | 0.8 | 6.8 | 17.9 | 47.7 | 32.4 | 38 |
| Atlantic | Farmed | 5.6 | 0.9 | 9.8 | 3.8 | 12.4 | 25.2 | 40.5 | 28.1 | 39 |
| Atlantic | Farmed | 3.71 | 10.51 |  | 27.23 | 26.65 | 22.4 |  |  | 40 |
| Atlantic | Farmed | 8.41 | 5.73 |  | 18.49 | 20.68 | 22.6 |  |  | 40 |
| Atlantic | Farmed | 3.7 |  | 2.94 |  | 11.5 |  |  |  | 41 |
| Atlantic | Farmed | 1.24 |  | 5.63 |  | 17.95 |  |  |  | 41 |
| Atlantic | Farmed | 0.57 |  | 7.04 | 2.5 | 46.58 |  |  |  | 42 |
| Atlantic | Farmed | 13.2 | 4.92 | 2.76 | 1.21 | 4.87 | 15.2 | 53.5 |  | 11 |
| Atlantic | Farmed | 12.3 | 4.43 | 2.85 | 1.51 | 4.62 | 16.1 | 53.8 |  | 11 |
| Atlantic | Farmed | 9.24 | 3.84 | 3.18 | 1.6 | 6.09 | 16.4 | 15.5 |  | 11 |
| Atlantic | Farmed | 13.5 | 5.24 | 2.79 | 1.08 | 4.88 | 14.6 | 53.6 |  | 11 |
| Atlantic | Farmed | 4.35 | 1.02 | 7.26 | 1.83 | 20.6 |  |  |  | 43 |
| Atlantic | Farmed | 4.52 | 1.07 | 6.64 | 1.93 | 12.75 |  |  |  | 43 |
| Atlantic | Wild | 1.24 | 0.82 | 9.17 | 3.04 | 20.2 |  |  |  | 43 |
| Atlantic | Farmed | 12.1 | 4 | 3.8 | 1.6 | 5.2 | 16.8 | 52.6 | 30.5 | 44 |
| Atlantic | Farmed | 2.3 | 1.1 | 9.7 | 3.1 | 8.8 | 27.9 | 34.2 | 30.2 | 45 |
| Atlantic | Farmed | 2.3 | 1 | 9.3 | 3.4 | 9.8 | 26.2 | 35.5 | 31 | 45 |
| Atlantic | Farmed | 2.3 | 1.1 | 10.1 | 3.8 | 9.7 | 25.9 | 33.9 | 32.7 | 45 |
| Atlantic | Farmed | 10.9 | 3.5 | 3 | 1.2 | 8.1 | 17.1 | 51.3 | 30.5 | 46 |
| Atlantic | Farmed | 9 | 3 | 3.6 | 1.3 | 9.5 | 18.7 | 49.6 | 30.2 | 46 |
| Atlantic | Farmed | 3.6 | 0.97 | 11.1 | 6.49 | 15.3 | 23.1 | 36.7 |  | 47 |
| Atlantic | Farmed | 4 | 0.9 | 5.4 |  | 7.7 | 19.3 | 47.8 |  | 48 |
| Atlantic | Farmed | 4.2 | 0.8 | 10.6 | 4 | 15.9 | 25.9 | 29.5 | 44.5 | 49 |
| Atlantic | Farmed | 2.26 | 1.46 | 10.11 | 2.11 | 170.5 |  |  |  | 50 |
| Atlantic | Farmed | 2.59 | 1.18 | 8.96 | 4.18 | 26.48 | 27.63 | 72.37 |  | 50 |
| Atlantic | Wild | 5.29 | 4.4 | 5.57 | 1.62 | 7.35 | 34.69 | 27.03 |  | 51 |
| Atlantic | Wild | 5.45 | 3.85 | 4.76 | 1.13 | 6.16 | 39.46 | 25.05 |  | 51 |
| Atlantic | Wild | 2.98 | 5.16 | 6.93 | 2.11 | 8.71 | 35.14 | 23.02 |  | 51 |
| Atlantic | Wild | 3.03 | 4.26 | 6.56 | 1.88 | 7.91 | 36.61 | 22.33 |  | 51 |
| Atlantic | Wild | 2.54 | 4.78 | 5.84 | 1.66 | 6.87 | 38.81 | 23.32 |  | 51 |
| Atlantic | Wild | 3.74 | 6.2 | 5.21 | 1.65 | 6.87 | 37.52 | 23.68 |  | 51 |
| Atlantic | Wild | 3.28 | 4.14 | 5.54 | 1.61 | 6.99 | 38.54 | 22.83 |  | 51 |
| Atlantic | Farmed | 4.6 | 1.6 | 5.8 | 2.2 | 12.8 |  |  |  | 52 |
| Atlantic | Farmed | 6.1 | 1.3 | 8 | 2.6 | 10.3 | 33 | 34.6 | 9.1 | 53 |
| Atlantic | Farmed | 13.4 | 5 | 1.8 | 0.8 | 2.8 |  |  |  | 54 |
| Atlantic | Farmed | 7.2 | 3.8 | 7.2 | 2.6 | 24.5 |  |  |  | 54 |
| Atlantic | Farmed | 16.18 | 9.54 |  |  |  | 20.4 | 46.19 | 36.68 | 55 |
| Atlantic | Farmed | 3.1 |  | 7.4 | 3.1 | 13.2 | 25.8 | 38.9 | 35.3 | 56 |
| Atlantic | Farmed | 4.5 |  | 7.6 | 3.3 | 12.8 | 29.1 | 34 | 36.9 | 56 |
| Atlantic | Farmed | 5.3 | 2.3 | 5.9 | 2.1 | 13.1 | 25.3 | 40.8 | 34 | 57 |

**References**

[1] Colombo S.M. & Mazal X. (2020). Investigation of the nutritional composition of different types

of salmon available to Canadian consumers. J. Agric. Food. Res., 2, 1-13.

[2] Friesen, E.N., Skura, B.J., Ikonomou, M.G., Oterhals, A., Higgs, D. A. 2015. Influence of terrestrial lipid and protein sources and activated carbon-treated fish oil on levels of persistent organic pollutants and fatty acids in the flesh of Atlantic salmon. Aquaculture Research. 46: 358-381

[3] Porter, P.J., Kramer, D.E., Kennish, J.M. 1992. Lipid composition of light and dark flesh of sockeye salmon. International Journal of Food Science and Technology. 27: 365-369

[4] Henriques, J., Dick, J.R., Tocher, D.R., Bell, J.G. 2014. Nutritional quality of salmon products available from major retailers in the UK: content and composition of n-3 long-chain PUFA. British Journal of Nutrition. 112: 964-975

[5] Ota, T., Sasaka, S., Abe, T., Takagi, T. 1990. Fatty acid compositions of the lipids obtained from commercial salmon products. Nippon Suisan Gakkaishi. 56: 323-327.

[6] Gladyshev, M.T., Lepskaya, E.V., Sushchik, N.N., Makhutova, O.N., Kalacheva, G.S. 2010. Differences in fatty acid composition between smolts of sockeye salmon and adults migrated from sea to lake for spawning. Biochemistry, biophysics, and molecular biology. 430: 29-32.

[7] Powell, M.S., Hardy, R.W. 2010. Proximate composition and fatty acid differences in hatchery-reared and wild snake river sockeye salmon overwintering in nursery lakes. North American Journal of Fisheries Management. 30: 530-537

[8] Takama, K., Suzuki, T., Yoshida, K., Arai, H., Anma, H. 1994. Lipid content and fatty acid composition of phospholipids in white-flesh fish species. Fisheries Science. 60: 177-184.

[9] Sasaki, S., Ota, T., Takagi, T. 1989. Compositions of fatty acids in the lipids of Masu salmon and Pink salmon, and latter canned flesh. Nippon Suisan Gakkaishi. 55: 1655-1660.

[10] A. C. M. Oliveira & P. J. Bechtel (2005) Lipid Composition of Alaska Pink

Salmon (Oncorhynchusgorbuscha) and Alaska Walleye Pollock (Theragrachalcogramma)

Byproducts, Journal of Aquatic Food Product Technology, 14:1, 73-91

[11] Lövkvist, S. An investigation of the lipid content and lipid composition in Atlantic salmon, pink salmon and striped catfish, obtained at the local retailer in Uppsala, Sweden. Thesis. Swedish University of Agricultural Sciences. <http://stud.epsilon.slu.se>

[12] Gladyshev, M.I., Artamonova, V.S., Makhrov, A.A., Sushchik, N.N., Kalachova, G.S., Dgebuadze, Y.Y. 2017. Triploidy does not decrease contents of eicosapentaenoic and docosahexaenoic acids in filets of pink salmon *Oncorhynchus gorbuscha*. Food Chemistry. 216: 66-69.

[13] Ota, T., Takagi, T., Terao, T. 1978. Changes in fatty acid composition of Masu salmon *Oncorhynchus masou,* reared in sea water. Bull. Fac. Fish. Hokkaido Univ. 29: 155-163

[14] Twibell, R.G., Gannam, A.L., Hyde, N.M., Holmes, J.S.A., Poole, J.B. 2012. Effects of fish meal- and fish oil-free diets on growth responses and fatty acid composition of juvenile coho salmon (*Oncorhynchus kisutch*). Aquaculture. 360-361: 69-77.

[15] Chan, J.C.K., Mann, J., Skura, B.J., Rowshandeli, M., Rowshandeli, N., Higgs, D.A. 2002. Effects of feeding diets and containing various dietary protein and lipid ratios on the growth performance and pigmentation of post-juvenile coho salmon *Oncorhynchus kisutch* reared in sea water. Aquaculture Research. 33: 1137-1156.

[16] Mjaavatten, O., Levings, C.D., Poon, P. 1998. Variation in the fatty acid composition of juvenile chinook and coho salmon from Fraser river estuary determined by multivariate analysis; role of environmental and genetic origin. Comp. Biochem. Physiol. B. 120: 291-309.

[17] Sasaki, S., Ota, T., Takagi, T. 1989. Compositions of fatty acids in the lipids of chum salmon during spawning migration. Nippon Suisan Gakkaishi. 55: 2191-2197.

[18] Ota, T., Takagi, T. 1989. Fatty acids in lipids of mature chum salmon, *Oncorhynchus keta,* with special reference to phytanic acid. Bull. Fac. Fish. Hokkaido Univ. 40: 313-322.

[19 ]Takama, K., Suzuki, T., Yoshida, K., Arai, H., Anma, H. 1994. Lipid content and fatty acid composition of phospholipids in white-flesh fish species. Fisheries Science. 60: 177-184.

[20] Ando, Y., Shimoyama, A., Ota, T. 1996. Changes in positional distribution of fatty acids in dorsal muscle triacyl-sn-glycerols from chum salmon, Oncorhynchus keta, at spawning season. Comp. Biochem. Physiol. B. 113: 89-93.

[21] Kiessling, A., Pickova, J., Eales, J.G., Dosanjh, B., Higgs, D. 2005. Age, ration level, and exercise affect the fatty acid profile of chinook salmon (*Oncorhynchus tshawytscha*) muscle differently. Aquaculture: 243: 345-356.

[22] Litz, M.N.C., Miller, J.A., Copeman, L.A., Teel, D.J., Weitkamp, L.A., Daly, E.A., Claiborne, A.M. 2017. Ontogenetic shifts in the diets of juvenile Chinook Salmon: new insight from stable isotopes and fatty acids. Environ Biol Fish (2017) 100:337–360

[23] Hanson, K.C., Twibell, R.G., Glenn, R.A., Barron, J.M., Gannam, A.L. 2016. The effects of a transition diet on the smoltification of chinook salmon. North American Journal of Aquaculture. 78: 307-313.

[24] Hixson, S.M., Parrish, C.C. Anderson, D.M. 2014. Full substitution of fish oil with camelina (Camelina sativa) oil, with partial substitution of fish meal with camelina meal, in diets for farmed Atlantic salmon (*Salmo salar*) and its effect on tissue lipids and sensory quality. Food Chemistry. 157: 51-61.

[25] Qian, C., Hart, B., Colombo, S.M. 2020. Re-evaluating the dietary requirement of EPA and DHA for Atlantic salmon in freshwater. Aquaculture. 518: 734870.

[26] Berge, G.M., Ruyter, B., Asgard, T. 2004. Conjugated linoleic acid in diets for juvenile Atlantic salmon (Salmo salar); effects on fish performance, proximate composition, fatty acid and mineral content. Aquaculture. 237: 365-380.

[27] Budge, S.M. Penney, S.N., Lall, S.P. Estimating diets of Atlantic salmon (Salmo *salar*) using fatty acid signature analyses; validation with controlled feeding studies. Can. J. Fish. Aquat. Sci. 69: 1033–1046

[28] Jensen, I-J., Eilertsen, K-E., Otnaes, C.H.A., Maekre, H.K., Elvevoll, E.O. 2020. An update on the content of fatty acids, dioxins, PCBs and heavy metals in farmed, escaped and wild Atlantic salmon (*Salmo salar* L.) in Norway. Foods. 9, 1901.

[29] Olsen, R.E., Taranger, G.L., Svasand, T., Skilbrei, O.T. 2013. Improved method for triacylglycerol-derived fatty acid profiling by various non-lethal and lethal sampling techniques in Atlantic salmon. Aquacult. Environ. Interact. 4: 251-261.

[30] Strobel, C., Jahreis, G., Kuhnt, K. 2012. Survey of n-3 and n-6 polyunsaturated fatty acids in fish and fish products. Lipids in Health and Disease. 11: 114.

[31] Blanchet, C., Lucas, M., Julien, P., Morin, R., Gingras, S., Dewailly, E. 2005. Fatty acid composition of wild and farmed Atlantic salmon *Salmo salar*  and rainbow trout *Oncorhynchus mykiss*. Lipids. 40: 529-531.

[32] Lozano-Munoz, I., Munoz, S., Diaz, N.F., Medina, A., Bazaes, J., Riquelme, C. 2020. Nutritional Enhancement of Farmed Salmon Meat via Non-GMO Nannochloropsis Gaditana: Eicosapentaenoic Acid (EPA, 20:5 n-3), Docosapentaenoic Acid (DPA, 22:5 n-3) and Vitamin D3 for Human Health. Molecules. 25, 4615.

[33] Nefedova, Z.A., Murzina, S.A., Pekkoeva, S.N., Voronin, V.P., Nemova, N.N. 2020. Comparative Characteristics of the Fatty-Acid Composition of Lipids in Factory and Wild Juveniles of Atlantic Salmon Salmo salar L. Contemporary Problems of Ecology. 13: 156-161.

[34] Ackman, R.G., Takeuchi, T. 1986. Comparison of fatty acids and lipids of smelting hatchery-fed and wild Atlantic salmon *Salmo salar*. Lipids. 21: 117-120.

[35] Murzina, S.A., Nefedova, Z.A., Pekkoeva, S.N., Veselov, A.E., Efremov, D.A., Nemova, N.N. 2016. Age-Specific Lipid and Fatty Acid Profiles of Atlantic Salmon Juveniles in the Varzuga River. Int. J. Mol. Sci. 17, 1050.

[36] Norambuena, F., Hermon, K., Skrzypczyk, V., Emergy, J.A., Sharon, Y., Beard, A., Turchini, G.M. 2015. Algae in Fish Feed: Performances and Fatty Acid Metabolism in Juvenile Atlantic Salmon. PLoS ONE(4). e0124042.

[37] Nuez-Ortin, W.G., Carter, C.G., Wilson, R., Cooke, I.R., Amoroso, G., Cobcroft, J.M., Nichols, P.D. 2017. Triploid Atlantic salmon shows similar performance, fatty acid composition and proteome response to diploids during early freshwater rearing. Comp. Biochem. Physiol. D. 22: 67-77.

[38] Betancor MB, Li K, Sprague M, Bardal T, Sayanova O, Usher S, et al. (2017) An oil containing EPA and DHA from transgenic Camelina sativa to replace marine fish oil in feeds for Atlantic salmon (Salmo salar L.): Effects on intestinal transcriptome, histology, tissue fatty acid profiles and plasma biochemistry. PLoS ONE 12(4): e0175415.

[39] Hixson, S.M., Parrish, C.C., Wells, J.S., Winkowski, E.M., Anderson, D.M., Bullerwell, C.N. 2016. Inclusion of camelina meal as a protein source in diets for farmed salmonids. Aquaculture Nutrition. 22: 615-630.

[40] Wagner, G.N. Balfry, S.K., Higgs, D.A., Lall, S.P., Farrell, A.P. 2004. Dietary fatty acid composition affects the repeat swimming performance of Atlantic salmon in seawater. Comp. Biochem. Physiol. A. 137: 567-576.

[41] Berge, G.M., Witten, P.E., Baeverfjord, G., Vegusdal, A., Wadsworth, S., Ruyter, B. 2009. Diets with different n−6/n−3 fatty acid ratio in diets for juvenile Atlantic salmon, effects on growth, body composition, bone development and eicosanoid production. Aquaculture. 296: 299-308.

[42] Bell, J.G., Youngson, A., Mitchell, A.I., Cowey, C.B. 1989. The effect of enhanced intake of linoleic acid on the fatty acid composition of tissue polar lipids of post-smolt Atlantic salmon (*Salmo salar*). Lipids. 24: 240-243.

[43] Olsen, Y., Skjervold, H. 1995. Variation in content of ω3 fatty acids in farmed Atlantic salmon, with special emphasis on effects of non-dietary factors. Aquaculture International. 3: 22-35.

[44] Pratoomyot, J., Bendiksen, E.A., Bell, J.G., Tocher, D.R. 2010. Effects of increasing replacement of dietary fishmeal with plant protein sources on growth performance and body lipid composition of Atlantic salmon (*Salmo salar* L.). Aquaculture. 305: 124-132.

[45] Einen, O., Waagan, B., Thomassen, M.S. 1998. Starvation prior to slaughter in Atlantic *salmon Salmo salar* I. Effects on weight loss, body shape, slaughter- and fillet-yield, proximate and fatty acid composition. Aquaculture. 166: 85-104.

[46] Hatlen, B., Berge, G.M., Odom, J.M., Mundheim H., Ruyter, B. 2012. Growth performance, feed utilisation and fatty acid deposition in Atlantic salmon, *Salmo salar* L., fed graded levels of high-lipid/high-EPA *Yarrowia lipolytica* biomass. Aquaculture. 364-365: 39-47.

[47] Higgs, D.A., Balfry, S.K., Oakes, J.D., Rowshandeli, M., Skura, B.J., Deacon, G. 2006. Efficacy of an equal blend of canola oil and poultry fat as an alternate dietary lipid source for Atlantic salmon (*Salmo salar* L.) in sea water. I: effects on growth performance, and whole body and fillet proximate and lipid composition. Aquaculture Research. 37: 180-191.

[48] Rosenlund, G., Obch, A., Sandberg, M.G., Sandal, H., Tveit, K. 2001. Effect of alternative lipid sources on long-term growth performance and quality of Atlantic salmon (*Salmo salar* L.). Aquaculture Research. 32: 323-328.

[49] Codabaccus, M.B., Bridle, A.R., Nichols, P.D., Carter, C.G. 2012. Restoration of fillet n-3 long-chain polyunsaturated fatty acid is improved by a modified fish oil finishing diet strategy for Atlantic salmon (*Salmo salar* L.) smolts fed palm fatty acid distillate. J. Agric. Food Chem. 60: 458-466.

[50] Dosanjh, B.S., Higgs, D.A., McKenzie, D.J., Randall, D.J., Eales, J.G., Rowshandeli, N., Rowshandeli, M., Deacon, G. 1998. Influence of dietary blends of menhaden oil and canola oil on growth, muscle lipid composition, and thyroidal status of Atlantic salmon (*Salmo salar*) in sea water. Fish Physiology and Biochemistry. 19: 123-134.

[51] Kaushik, S.J., Corraze, G., Radunz-Neto, J. Larroquet, L., Dumas, J. 2006. Fatty acid profiles of wild brown trout and Atlantic salmon juveniles in the Nivelle basin. J. Fish Biol. 68: 1376-1387.

[52] Thomassen, M.S., Rein, D., Berge, G.M., Ostbye, T-K., Ruyter, B. 2012. High dietary EPA does not inhibit Δ5 and Δ6 desaturases in Atlantic salmon (*Salmo salar* L.) fed rapeseed oil diets. Aquaculture. 360-361: 78-85.

[53] Glencross, B.D., Tocher, D.R., Matthew, C., Bell, J.G. 2014. Interactions between dietary docosahexaenoic acid and other long-chain polyunsaturated fatty acids on performance and fatty acid retention in post-smolt Atlantic salmon (*Salmo salar*). Fish Physiol. Biochem. 40: 1213-1227.

[54] Mørkøre, T., Moreno, H.M., Bordenas, J., Larsson, T., Heldberg, H., Hatlen, B., et al. 2020. Dietary inclusion of Antarctic krill meal during the finishing feed period improves health and fillet quality of Atlantic salmon (*Salmo salar* L.). Br. J. Nutr. 124: 418-431.

[55] Erdem, O.A., Alkan, B., Dincer, M. 2020. Comparison on nutritional properties of wild and cultured brown trout and Atlantic salmon. Ege Journal of Fisheries and Aquatic Sciences. 37: 37-41.

[56] Miller, M.R., Nichols, P.D., Carter, C.G. 2007. Replacement of fish oil with thraustochytrid *Schizochytrium* sp. L oil in Atlantic salmon parr (*Salmo salar* L) diets. Comp. Biochem. Physiol. A. 148: 382-392.

[57] Pratoomyot, J., Bendiksen, E., Bell, J.G., Tocher, D.R. 2008. Comparison of effects of vegetable oils blended with southern hemisphere fish oil and decontaminated northern hemisphere fish oil on growth performance, composition and gene expression in Atlantic salmon (*Salmo salar* L.). Aquaculture. 280: 170-178.
